# Supplementary material for: Combining ChIP-chip and Expression Profiling to Model the MoCRZ1 Mediated Circuit for Ca2+/Calcineurin Signaling in the Rice Blast Fungus
Source: PLoS Pathog. 2010 May 20;6(5):e1000909. doi: 10.1371/journal.ppat.1000909 (PMC2873923; doi:10.1371/journal.ppat.1000909)
Supplement: Table S5 — Primers used in this study. (0.04 MB XLS) [file ppat.1000909.s005.xls]

## Sheet: Table S5
Table S5. Primers used in this study.
Name	Seq
A. Primers for real-time PCR with ChIPed DNA
PMC1_5uf	CAAGCGTGGGCTTCTATGTT
PMC1_5ur	TTCGATCGCTTCCTTCTGAT
btub_5uf	GTTGCAGCTAGCACAGACCA
btub_5ur	GTCGGGATTGATTGGATTTG
B. Primers used in real-time RT-PCR
PMC1_RTF	CGCAAGTCTCATGAATCCAG
PMC1_RTR	CAAAAGTCGCAACGTAGTGG
CRZ_qF	GCCTGCATTCTGGAGAGAAG
CRZ_qR	CAGATTCTTTGCCGTTCCAT
MGG_1150RTF	CGGACCAACAAATCCCTATG
MGG_1150RTR	GGTAGCCACTCCCATGTCGT
MGG_2402OF	AAATGTCCACACCACACCTCTC
MGG_2402OR	CCATGCCCTCGAGCTCGCGG
MGG_03218RTF	CAGGTTGCACCATAACAAGG
MGG_03218RTR	GAGCTGCGTGCATAAGCTCG
MGG_03470RTF	TAATGTACGGGCTCGGTGAT
MGG_03470RTR	GATCGTGTCCCATTGAACCT
MGG_03530RTF	TATGGACCCCGGTAGACAGA
MGG_03530OR	GCATTACAACGCAGTCGCCATC
MGG_06359RTF	CTCCTCAAGGTCCTGCAAAG
MGG_06359OR	GAGTCTTGATGGTCAGCTTC
MGG_07100RTF	ACTTGCTCCTTCAGCGAGTC
MGG_07100OR	GAATCATAACTACACCTCCGAC
MGG_07230RTF	CGTCAGGTTCCGGAGAAATA
MGG_07230RTR	AAGTCCGAAACCCAACCTTT
MGG_07231RTF	CGAGGGTCAGATGCTAGAGG
MGG_07231OR	TGAGAGAACTCCCTCCCCA
MGG_07603RTF	TTGACGGGTACAAACTCGTG
MGG_07603RTR	AAATTTGCCCTGCTTGGAC
MGG_08024RTF	CGTTTTTACACTGCTCCTTGC
MGG_08024RTR	AGGCAGTCGGAGTAGCAGAC
MGG_08543RTF	CATGAAGACCACCGCCACC
MGG_08543OR	TCTTGCCGCACCAGTCGG
MGG_10024RTF	AGCATGGAGAGCTTTCTGGA
MGG_10024OR	GGTAGCGGAAGAAGTCGCATT
MGG_11047RTF	ATTGTGCGATATGCAATGGA
MGG_11047RTR	GCTTGGAGCTCCTGAAGTTG
MGG_13346RTF	GTGCTGATCTCGGCTTTTGT
MGG_13346RTR	CCCTGGAGCACACTAGGAAA
MGG_13350RTF	GCCCCCGAGAGGTACTTTAC
MGG_13350RTR	AAGCCCAACAATCGTAGCTG
MGG_13944RTF	CCTCCTCTGCTGCTACTGCT
MGG_13944RTR	GGGTTGTTGCACTCCGTTAT
cypF	GCCTAACGTTTTCTTCGACATTTC
cypR	GTTCTCGTCGGCAAACTTCTC
btubF	TCGACAGCAATGGAGTTTACAA
btubR	AGCACCAGACTGACCGAAGAC
C. Primers for protein expression in E. coli
CRZ_eF	AAGCGGCCGCATATGGATCAGTTGCAGCACCACC
CRZ_eR	GACTAGCGACCACCGTAGTCACT
D. Primers used in EMSA
CRZ_PCF_biotin	5'-/5BiosG/CA CTA TCC CTG CTC GAG GTC
CRZ_UR2_Biotin	5'- /5BiosG/GA CGA GGC AGA AAA CGA GTC
CBP_PC_F	CCAATTTGGACCCACTAAGC
CBP_UR2_biotin	5'- /5BiosG/CT TGG CGT TTC TTG GTT TGT
